# Supplementary material for: Interference of anti-streptavidin antibodies in immunoassays: a very rare phenomenon or a more common finding?
Source: publisher site journal article supplement (doi:10.1515/cclm-2019-1064), 2019-11-29

Supplementary Figure 1. Least squares regression analyses of age relative to the anti-streptavidin (AS)-IgG (A) and AS-IgM (B) concentrations. **A**: y (AS-IgG concentration, µg/L)=1.962–0.0078x (age, years); n=500. **B**: y (AS-IgM concentration, µg/L)=16.74–0.117x (age, years); n=500.


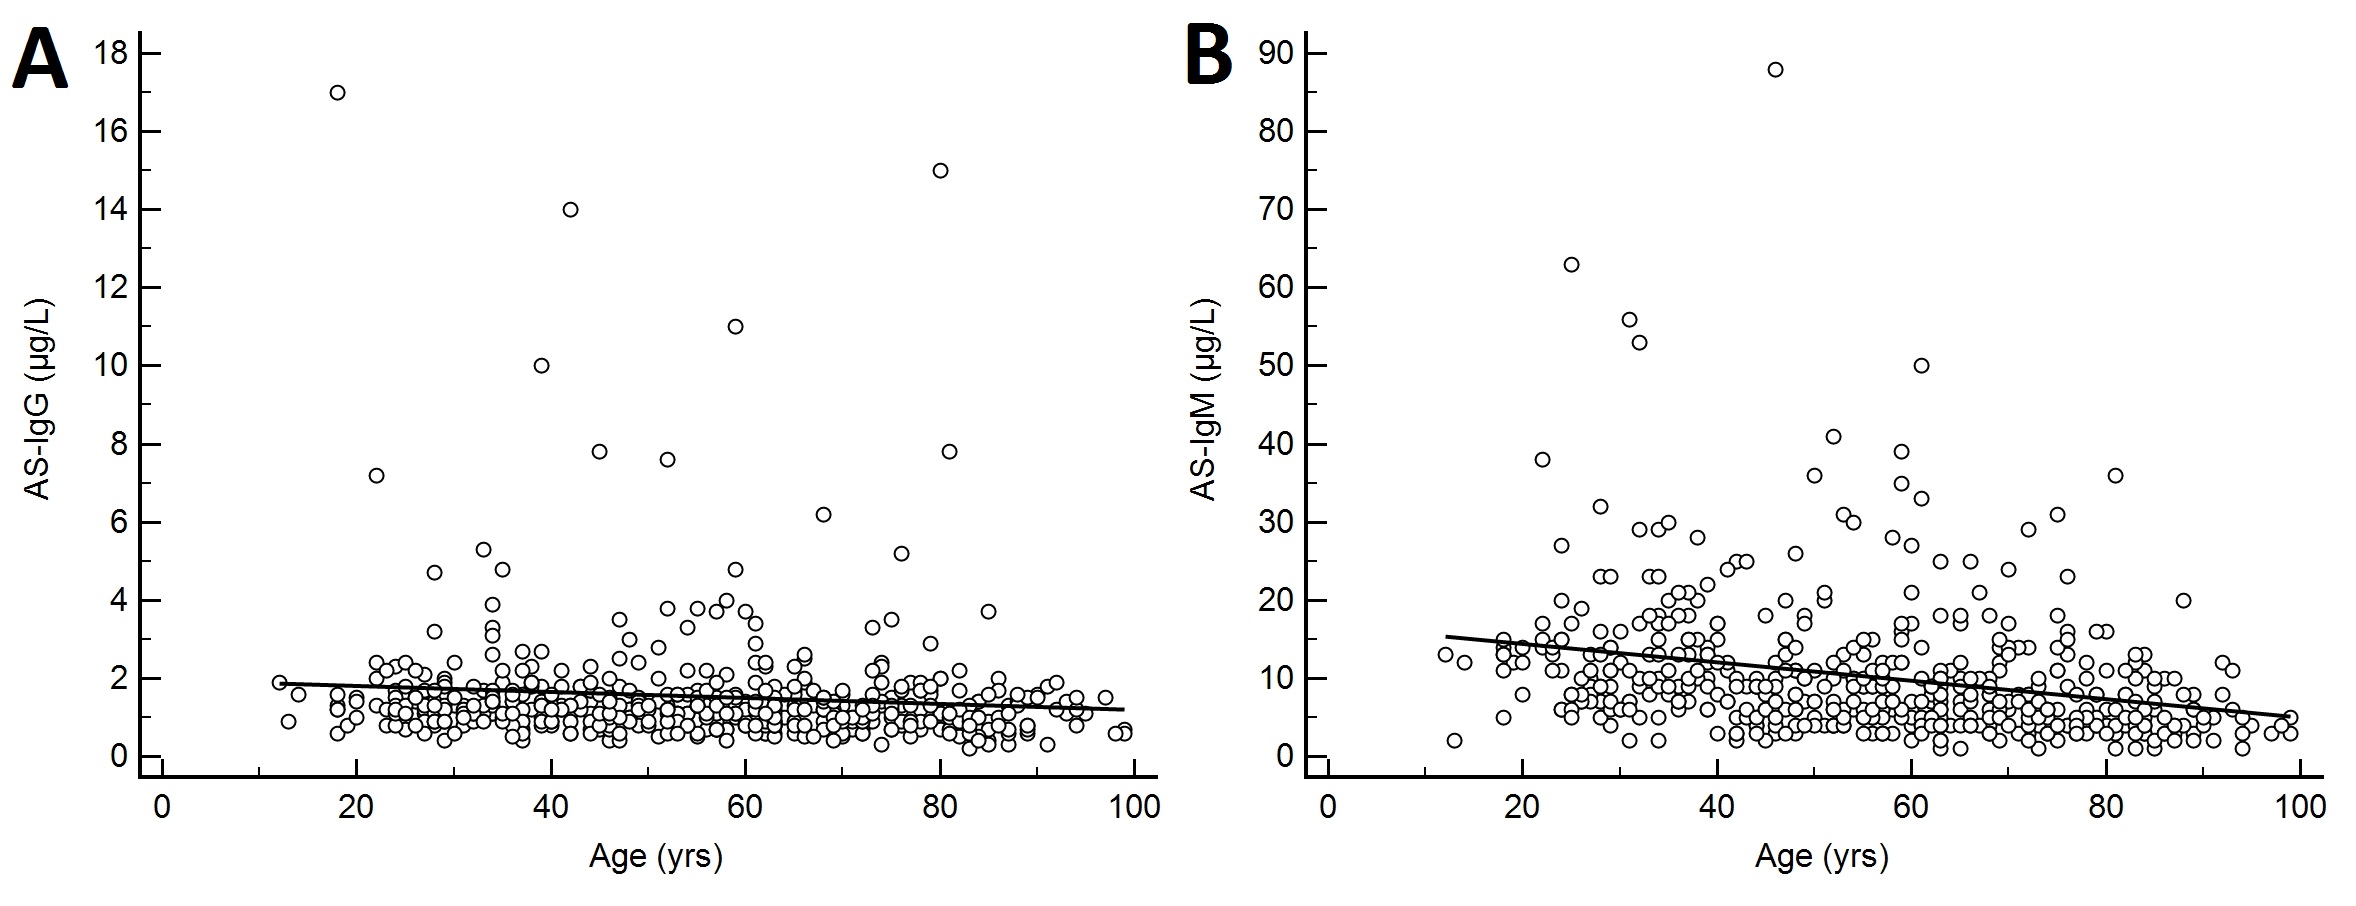

Supplement: Supplementary file 1 [file cclm-2019-1064_suppl.docx]
